# Supplementary material
Source: MDPI journal article supplement (https://www.mdpi.com/2078-2489/12/11/444)
Supplement: s1 [file s1]

Archive with 1 entries (1 files):
- information-1375066-supplementary.pdf
